# Supplementary material for: Differential effects of physical activity on cognitive and motor performance in obese young adults
Source: PeerJ. 2025 Dec 9;13:e20481. doi: 10.7717/peerj.20481 (PMC12700113; doi:10.7717/peerj.20481)
Supplement: Supplemental Information 2 — Includes all participants assessed for physical activity level, cognitive performance, and gait speed. These data were used in the statistical analysis comparing the physically active and sedentary groups. [file peerj-13-20481-s002.xlsx]

## Sheet: Sheet1
Group (1-active, 2-sedentary)	Gender (1-male, 2-female)	Age	Weight	Height	Waist circumference	Hip circumference	BMI	Waist-hip ratio	% Body fat	Fat mass (kg)	Fat free mass (kg)	MET-minute/week	TMTB-A	LM	HRT(sec)	Correct answer in W condition	Correct answer in C condition	Correct answer in CW condition	Interference score	10-MWT (m/s)
1	1	19	71.9	1.63	90.7	106.5	27.06	0.85	25.2	18.1	53.8	2640	19.72	20	0.2	100	80	40	-4.44	1.76
1	1	20	111.3	1.84	110.5	122	32.87	0.91	31.9	35.5	75.8	2880	28.44	23	0.54	122	83	58	8.6	1.8
1	2	20	82.6	1.73	90	114	27.6	0.79	40	33	49.6	1440	35.07	25	0.25	129	86	48	-3.6	2.06
1	2	19	80.9	1.63	96.5	114	30.45	0.85	43	34.8	46.1	2920	48.22	20	0.23	109	71	49	6.01	1.34
1	2	21	74.3	1.59	90	106	29.39	0.85	41.8	31.1	43.2	2460	74.95	24	0.24	115	84	35	-13.54	1.88
1	2	20	102.5	1.66	106	124	37.2	0.86	50.8	52.1	50.4	1440	46.9	21	0.2	130	79	50	0.86	1.75
1	2	22	63.9	1.59	88	102	25.28	0.86	36.3	23.2	40.7	600	53.19	28	0.28	124	72	53	7.45	1.74
1	2	20	72.9	1.67	80	101.5	26.14	0.79	38.8	28.3	44.6	720	25.94	33	0.25	83	72	55	16.45	1.48
1	2	20	80.3	1.57	105.8	106.5	32.58	0.99	45.2	36.3	44	8280	61.19	19	0.24	107	100	48	-3.69	2.1
1	2	19	88.6	1.65	92	121	32.54	0.76	45.5	40.3	48.3	1800	58.56	15	0.24	89	69	40	1.13	1.86
1	2	21	83.7	1.65	99	110	30.74	0.9	43	36	47.7	5160	20.92	10	0.25	118	94	57	4.68	1.85
1	2	19	92	1.59	98	116	36.39	0.85	49.5	45.5	46.5	2760	50.75	27	0.24	118	79	52	4.68	2.09
1	1	23	104.8	1.83	106.5	114	31.29	0.93	29.5	30.9	73.9	3880	22.12	18	0.24	116	98	61	7.88	1.86
1	2	21	64.5	1.53	76	96	27.55	0.79	39.2	25.3	39.2	1800	54.78	27	0.25	95	72	48	7.04	2.39
1	2	19	66.2	1.58	78	97	26.52	0.8	39.2	26	40.3	2160	17.68	23	0.24	102	68	47	6.2	1.8
1	2	22	81.8	1.54	95	111	34.49	0.86	48	39.3	42.5	1200	25.68	29	0.23	89	84	77	33.79	1.54
1	1	18	94.7	1.8	96	106	29.23	0.91	29.2	27.7	67.1	720	26.83	24	0.22	103	91	72	23.69	1.73
1	2	23	78.3	1.6	96	107	30.59	0.9	42.8	33.5	44.8	1440	23.98	23	0.21	91	58	32	-3.42	1.53
1	1	25	81.4	1.75	95	98.4	26.58	0.97	26.2	21.3	60.1	1120	40.78	21	0.23	125	109	71	12.77	1.64
1	2	18	69.7	1.58	88.5	105.5	27.92	0.84	37.9	26.4	43.3	1200	39.76	22	0.26	121	86	58	7.73	1.45
1	2	22	80.4	1.65	92	105.4	29.53	0.87	42.4	34.1	46.3	1920	46.87	25	0.28	114	77	49	3.04	2.11
1	1	21	89.8	1.73	102	100.4	30	1.02	28.8	25.9	63.9	2200	30.8	10	0.25	94	79	49	6.08	2.1
1	1	22	84.9	1.72	109.4	106.3	28.7	1.03	33.2	28.2	56.7	2320	46.5	16	0.23	120	80	58	10	1.86
1	1	23	93.4	1.76	109	111	30.15	0.98	28.3	26.4	67	3120	28.3	18	0.3	102	60	50	12.22	1.54
1	2	20	76.2	1.66	88	104	27.65	0.85	38.7	29.5	46.7	1440	34.46	27	0.24	101	77	45	1.31	1.75
1	1	21	87.6	1.8	105	109	27.04	0.96	29	25.4	62.2	1080	66.42	20	0.29	103	73	40	-2.72	1.65
1	2	19	99.2	1.67	103	117	35.57	0.88	48	47.6	51.6	1080	56.18	28	0.21	102	74	43	0.11	2.08
1	1	21	89.5	1.66	112	108	32.48	1.04	31.6	28.3	61.2	1800	57.18	20	0.24	96	71	40	-0.81	1.92
1	2	23	70.4	1.64	81	100	26.17	0.81	37.4	26.3	44.1	840	21.02	21	0.2	145	95	51	-6.4	1.84
1	2	23	72.6	1.62	78	105	27.66	0.74	40.5	29.4	43.2	1440	29.59	22	0.23	100	80	52	7.56	1.44
1	1	20	85.1	1.77	85.8	96.3	27.16	0.89	23.2	19.7	65.4	3120	44.81	18	0.22	110	80	43	-3.32	1.97
1	1	20	95.8	1.83	108.5	101.5	28.61	1.07	25.3	24.2	71.6	6880	36.71	15	0.25	86	75	43	2.94	1.86
1	2	21	92.1	1.65	98	119	33.83	0.82	47.4	43.7	48.4	3840	67.52	24	0.23	112	67	42	0.08	1.73
1	2	23	74.7	1.58	89	107	29.92	0.83	42.6	31.8	42.9	5960	39.83	24	0.25	84	72	38	-0.77	1.61
1	1	20	74.5	1.7	92	104	25.78	0.89	20.3	15.1	59.4	4520	29.64	19	0.26	72	58	41	8.88	2.15
1	2	18	85.2	1.64	97.5	109	31.68	0.89	30.4	25.9	59.3	960	46.78	13	0.31	81	62	60	24.88	1.72
1	2	21	89.1	1.71	110	124	30.47	0.89	45.3	40.4	48.7	3640	19.24	16	0.27	115	90	50	-0.49	1.76
1	2	21	97.7	1.65	95	132	35.89	0.72	50.2	49.1	48.7	4880	65.2	22	0.21	96	62	37	-0.67	1.93
2	1	22	78.3	1.75	94.5	102.3	25.57	0.92	22.8	17.9	60.5	0	38.56	17	0.24	80	59	37	3.04	2.08
2	2	22	89.3	1.63	100	120	33.61	0.83	47.1	42.1	47.2	0	18.73	15	0.25	98	73	46	4.16	1.74
2	2	21	70	1.58	93	107	28.04	0.87	40	28	42	80	45.19	28	0.22	101	55	37	1.39	1.91
2	2	20	72.1	1.52	86	106	31.21	0.81	43.8	31.6	40.5	560	41.92	22	0.25	100	72	40	-1.86	1.52
2	2	23	72.5	1.55	82	104.5	30.18	0.79	44	31.9	40.6	400	62.69	21	0.21	113	92	46	-4.71	1.73
2	2	22	70.7	1.61	82	93.2	27.28	0.88	38.4	27.2	43.6	60	39.43	22	0.23	96	74	46	4.21	1.9
2	2	19	64.3	1.5	90	104	28.58	0.87	41.6	26.8	37.6	0	33.14	23	0.2	105	72	51	8.29	1.93
2	2	21	79.6	1.65	86	110	29.24	0.78	41.6	33.1	46.5	120	67.45	23	0.25	115	86	63	13.8	2.16
2	2	19	75.5	1.61	94	110.5	29.13	0.85	41.2	31.1	44.4	400	110.43	10	0.23	89	72	38	-1.8	1.54
2	2	21	69.2	1.6	91	107	27.03	0.85	36.7	25.4	43.8	240	44.35	19	0.23	97	69	35	-5.32	1.52
2	2	18	71	1.61	89	110.5	27.39	0.81	39.9	28.3	42.7	240	28.52	32	0.22	84	68	50	12.42	1.8
2	2	22	84.9	1.61	94.5	100	32.75	0.95	45.1	38.3	46.6	0	28.91	27	0.31	64	59	37	6.3	1.56
2	1	23	110	1.78	118	118.7	34.72	0.99	34.7	38.2	71.9	320	81.44	21	0.24	99	62	41	2.88	1.81
2	2	23	100	1.75	99	109	32.65	0.91	46.2	46.3	53.9	0	39.68	25	0.26	124	89	71	19.19	2.15
2	2	22	117.6	1.58	138.2	146.5	47.11	0.94	58.9	69.3	48.3	240	54.76	22	0.32	108	70	46	3.53	1.83
2	2	22	60.2	1.53	81	96	25.72	0.84	38.4	23.1	37.1	360	54.88	22	0.23	95	72	40	-0.96	1.65
2	2	21	75.9	1.57	98	113	30.79	0.87	43.7	33.2	42.7	220	31.33	28	0.24	80	59	46	12.04	1.64
2	2	21	63.2	1.59	83	97	25	0.86	37	23.4	39.8	540	42.37	25	0.22	118	77	51	4.41	1.67
2	2	20	82	1.67	86	107	29.4	0.8	43	35.3	46.7	540	48.42	20	0.27	117	72	40	-4.57	1.92
2	2	21	76.1	1.67	86	108	27.29	0.8	39	29.7	46.4	240	50.52	20	0.28	105	80	54	8.59	2.14
2	2	22	79	1.66	84	110	28.67	0.76	42	33.2	45.8	0	45.47	20	0.23	100	66	42	2.24	1.99
2	2	22	77.5	1.65	109	107	28.47	1.02	41	31.8	45.7	0	72.92	22	0.23	120	84	58	8.59	2.2
2	1	23	72.9	1.67	85.5	96.2	26.14	0.89	24.9	18.2	54.8	0	59.94	14	0.21	104	60	35	-3.05	1.84
2	1	21	88.3	1.75	103.5	107.3	28.83	0.97	26.1	23.1	65.3	0	27.79	15	0.22	87	72	46	6.6	1.82
2	1	20	80.2	1.69	99	102	28.08	0.97	30.6	24.5	55.7	0	57.6	4	0.23	103	69	32	-9.32	1.98
2	1	19	75.8	1.72	97	106	25.62	0.92	26.7	20.2	55.6	320	57.87	1	0.32	85	63	33	-3.18	1.74
2	1	20	128.5	1.77	127	135	41.02	0.94	39.8	51.1	77.4	0	61.43	8	0.25	98	69	43	2.51	2.03
2	1	23	81.6	1.65	102	104	29.97	0.98	31	25.3	56.3	240	59.49	13	0.27	109	81	41	-5.47	1.72
2	2	22	114	1.73	109	125	38.09	0.87	52.1	59.4	54.6	360	55.97	16	0.22	103	95	49	-0.42	1.67
2	2	22	132.6	1.61	134	150	51.16	0.89	63.1	83.7	48.9	0	46.79	21	0.3	106	80	60	14.41	1.38
2	2	22	80.2	1.58	94	113	32.13	0.83	45.9	36.8	43.4	80	42.35	12	0.24	94	74	36	-5.4	1.66
2	2	21	68.6	1.51	85	105	30.09	0.81	42.7	29.3	39.3	480	37.04	9	0.22	116	92	48	-3.31	1.95
2	2	20	76	1.63	95	107	28.6	0.89	40.3	30.6	45.4	180	48.3	27	0.21	92	66	46	7.57	1.64
2	1	19	121	1.8	113.5	125	37.35	0.91	36.4	44	77	120	102.65	11	0.34	68	53	19	-10.79	1.35
2	1	21	79.9	1.7	94	100.5	27.65	0.94	27.8	22.2	57.7	500	76.57	20	0.24	86	58	34	-0.64	1.74
2	1	22	108.6	1.72	118.7	121	36.71	0.98	33.9	36.8	71.8	0	42.55	20	0.2	103	68	37	-3.96	1.92
2	1	22	98.4	1.92	98.5	109.3	26.69	0.9	23.4	23	75.4	120	34.28	15	0.27	101	72	50	7.97	1.87
2	1	21	85.2	1.75	103	106	27.82	0.97	25.8	22	63.2	160	72.48	11	0.24	85	61	47	11.49	1.83

## Sheet: Sheet2
	fat mass	FFM
1	18.1	53.8
2	35.5	75.8
3	33	49.6
4	34.8	46.1
5	31.1	43.2
6	52.1	50.4
8	23.2	40.7
9	28.3	44.6
10	36.3	44
11	40.3	48.3
13	36	47.7
14	45.5	46.5
15	30.9	73.9
16	25.3	39.2
17	26	40.3
18	39.3	42.5
21	27.7	67.1
22	33.5	44.8
23	21.3	60.1
24	26.4	43.3
26	34.1	46.3
27	25.9	63.9
28	28.2	56.7
29	26.4	67
30	29.5	46.7
31	25.4	62.2
32	47.6	51.6
33	28.3	61.2
34	26.3	44.1
35	29.4	43.2
37	19.7	65.4
38	24.2	71.6
39	43.7	48.4
40	31.8	42.9
41	15.1	59.4
42	25.9	59.3
43	40.4	48.7
44	49.1	48.7
46	17.9	60.5
47	42.1	47.2
48	28	42
49	31.6	40.5
50	31.9	40.6
51	27.2	43.6
52	26.8	37.6
54	33.1	46.5
55	31.1	44.4
56	25.4	43.8
57	28.3	42.7
58	38.3	46.6
59	38.2	71.9
60	46.3	53.9
61	69.3	48.3
62	23.1	37.1
63	33.2	42.7
64	23.4	39.8
65	35.3	46.7
66	29.7	46.4
69	33.2	45.8
70	31.8	45.7
71	18.2	54.8
72	23.1	65.3
73	24.5	55.7
74	20.2	55.6
75	51.1	77.4
76	25.3	56.3
77	59.4	54.6
78	83.7	48.9
79	36.8	43.4
80	29.3	39.3
82	30.6	45.4
83	44	77
84	22.2	57.7
86	36.8	71.8
89	23	75.4
90	22	63.2
